# Supplementary material for: Spectral attenuation of gravity wave and model calibration in pack ice
Source: Copernicus journal article supplement (doi:10.5194/tc-2019-290), 2019-12-17
Supplement: Supplementary file 1 [file tc-2019-290-supplement.pdf]

## Supplemental material

An example of fitting  $E(k_r, \theta)$  at a given  $k_r$  with the Gaussian distribution is shown in Figure 2(a), where  $\theta$  is measured counterclockwise from the positive range-axis in the range-azimuth domain. The directional ambiguity inherent in the SAR retrievals is removed with the aid of the in-situ observed wave direction

5 (Thomson et al., 2018).

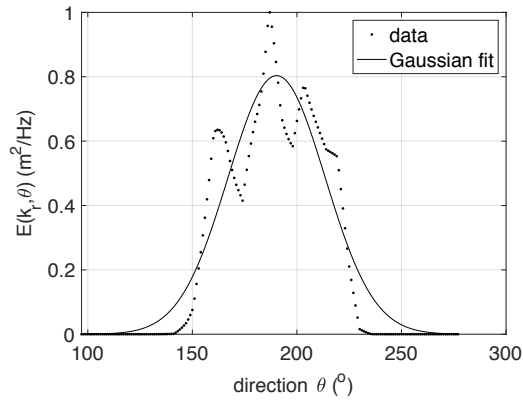

Figure S1. Demonstration of fitting the main wave direction  $\theta_{k_r}$  for  $k_r = 0.025\text{m}^{-1}$  by a Gaussian distribution.

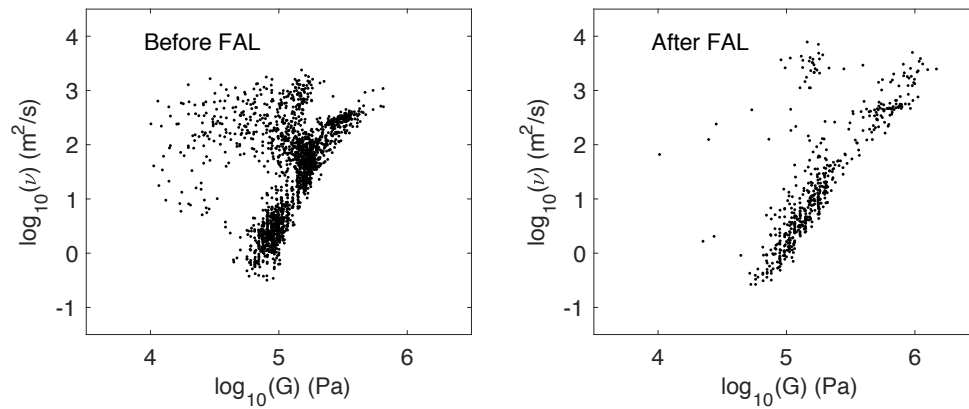

Figure S2. Scatter plots of calibrated  $G, \nu$  of the WS model after filtered outliers discussed in section 4.3.

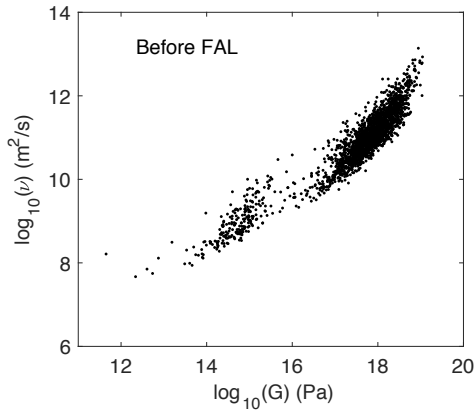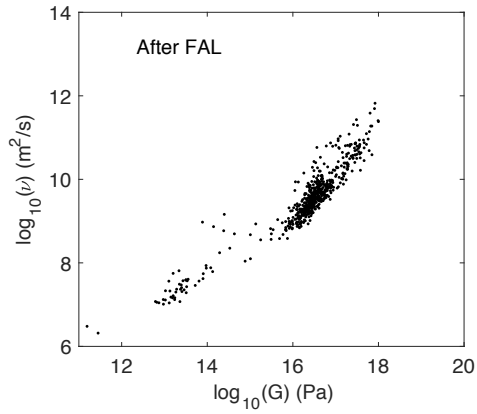

10

Figure S3. Scatter plots of calibrated  $G, \nu$  of the FS model.

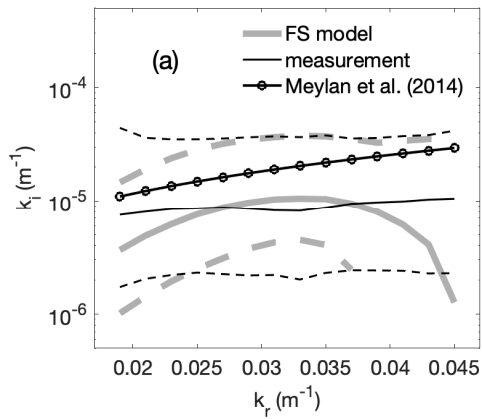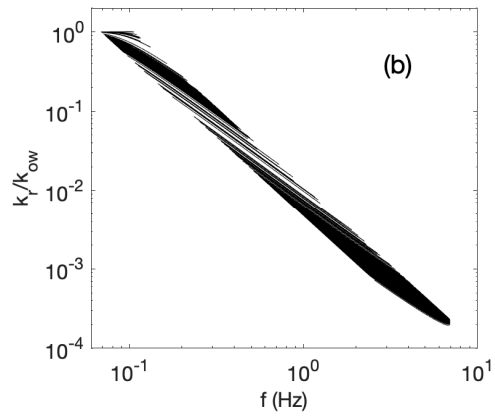

Figure S4. Similar as Figure 6 for the FS model.

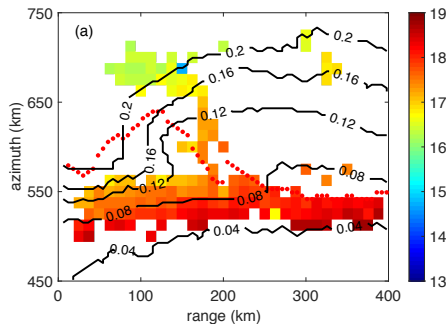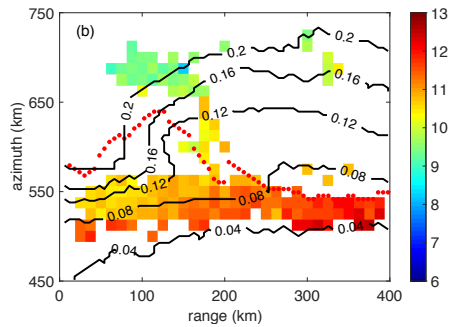

15

Figure S5. Similar as Figure 7 for the FS model.
